# Supplementary material for: Regulation of G2/M Transition by Inhibition of WEE1 and PKMYT1 Kinases
Source: MDPI journal article supplement (doi:10.3390/molecules22122045), 2017-11-23
Supplement: s1 [file s1]

| Clinical Trial Identifier | Title                                                                                                                                           | Cancer                                                                        | Drug                                                                                     | Phase  | Status     |
|---------------------------|-------------------------------------------------------------------------------------------------------------------------------------------------|-------------------------------------------------------------------------------|------------------------------------------------------------------------------------------|--------|------------|
| NCT01164995               | <b>Study With Wee-1 Inhibitor MK-1775 and Carboplatin to Treat p53 Mutated Refractory and Resistant Ovarian Cancer</b>                          | Epithelial Ovarian Cancer                                                     | MK1775 + Carboplatin                                                                     | 2      | unknown    |
| NCT01047007               | <b>A Dose Escalation Study of MK1775 in Combination With 5-FU or 5-FU/CDDP in Patients With Advanced Solid Tumor</b>                            | Solid Tumors                                                                  | MK1775 + 5-FU vs. MK1775 + 5-FU/Cisplatin                                                | 1      | terminated |
| NCT02095132               | <b>WEE1 Inhibitor MK-1775 and Irinotecan Hydrochloride in Treating Younger Patients With Relapsed or Refractory Solid Tumors</b>                | Childhood Central Nervous System Neoplasm; Recurrent Malignant Solid Neoplasm | MK1775<br>MK1775 + Irinotecan                                                            | 1<br>2 | recruiting |
| NCT01076400               | <b>A Study of MK1775 in Combination With Topotecan/Cisplatin in Patients With Cervical Cancer</b>                                               | Cervical Cancer                                                               | MK1775 + Topotecan/Cisplatin<br>Topotecan/Cisplatin ± MK1775                             | 1<br>2 | terminated |
| NCT00648648               | <b>A Dose Escalation Study of MK1775 in Combination With Either Gemcitabine, Cisplatin, or Carboplatin in Adults With Advanced Solid Tumors</b> | Solid Tumors                                                                  | MK1775 vs.<br>MK1775 + Gemcitabine vs.<br>MK1775 + Cisplatin vs.<br>MK1775 + Carboplatin | 1      | completed  |

|             |                                                                                                                                                                                                     |                                                                                                                      |                                 |   |            |
|-------------|-----------------------------------------------------------------------------------------------------------------------------------------------------------------------------------------------------|----------------------------------------------------------------------------------------------------------------------|---------------------------------|---|------------|
| NCT01357161 | <b>A Study of MK-1775 in Combination With Paclitaxel and Carboplatin Versus Paclitaxel and Carboplatin Alone for Participants With Platinum-Sensitive Ovarian Tumors With the P53 Gene Mutation</b> | Ovarian Cancer                                                                                                       | Pacitaxel/Carboplatin ± MK1775  | 2 | completed  |
| NCT02196168 | <b>Cisplatin With or Without WEE1 Inhibitor MK-1775 in Treating Patients With Recurrent or Metastatic Head and Neck Cancer</b>                                                                      | Hypopharyngeal, Laryngeal, Lip and Oral Cavity, Nasal Cavity and Paranasal Sinus, Oropharyngeal, or Tongue Carcinoma | Cisplatin ± MK1775              | 2 | terminated |
| NCT02101775 | <b>Gemcitabine Hydrochloride With or Without WEE1 Inhibitor MK-1775 in Treating Patients With Recurrent Ovarian, Primary Peritoneal, or Fallopian Tube Cancer</b>                                   | Ovarian Carcinoma;<br>Primary Peritoneal Carcinoma;<br>Fallopian Tube Cancer                                         | Gemcitabine ± MK1775            | 2 | recruiting |
| NCT01958658 | <b>AZD1775, Cisplatin, and Radiation Therapy in Treating Patients With Cervical Cancer</b>                                                                                                          | Cervical Cancer (Stage I B - III B)                                                                                  | MK1775 ± Cisplatin/Radiation    | 1 | suspended  |
| NCT02513563 | <b>AZD1775 Plus Carboplatin-Paclitaxel in Squamous Cell Lung Cancer</b>                                                                                                                             | Squamous Cell Lung Cancer                                                                                            | MK1775 + Carboplatin/Paclitaxel | 2 | recruiting |

|             |                                                                                                                                                                                                                                                        |                                                                                                                                                  |                                    |       |                     |
|-------------|--------------------------------------------------------------------------------------------------------------------------------------------------------------------------------------------------------------------------------------------------------|--------------------------------------------------------------------------------------------------------------------------------------------------|------------------------------------|-------|---------------------|
| NCT02037230 | <b>Dose Escalation Trial of AZD1775 and Gemcitabine (+Radiation) for Unresectable Adenocarcinoma of the Pancreas</b>                                                                                                                                   | Pancreatic Cancer                                                                                                                                | MK1775 + Gemcitabine/Radiation     | 1     | recruiting          |
| NCT02508246 | <b>WEE1 Inhibitor MK-1775, Docetaxel, and Cisplatin Before Surgery in Treating Patients With Borderline Resectable Stage III-IVB Squamous Cell Carcinoma of the Head and Neck</b>                                                                      | Head and Neck Squamous Cell Carcinoma                                                                                                            | MK1775 + Cisplatin/Docetaxel       | 1     | recruiting          |
| NCT02194829 | <b>Paclitaxel Albumin-Stabilized Nanoparticle Formulation and Gemcitabine Hydrochloride With or Without WEE1 Inhibitor MK-1775 in Treating Patients With Previously Untreated Pancreatic Cancer That Is Metastatic or Cannot Be Removed by Surgery</b> | Metastatic Pancreatic Adenocarcinoma;<br>Pancreatic Cancer (Stage III-IV)                                                                        | Pacitaxel/Gemcitabine $\pm$ MK1775 | 1 / 2 | temporarily stopped |
| NCT01922076 | <b>WEE1 Inhibitor AZD1775 and Local Radiation Therapy in Treating Younger Patients With Newly Diagnosed Diffuse Intrinsic Pontine Gliomas</b>                                                                                                          | Diffuse Intrinsic Pontine Glioma;<br>Untreated Childhood Anaplastic Astrocytoma,<br>Anaplastic Oligoastrocytoma, Glioblastoma,<br>or Gliosarcoma | Radiation + MK1775                 | 1     | recruiting          |

|             |                                                                                                                                        |                                                                                     |                                                                                           |   |            |
|-------------|----------------------------------------------------------------------------------------------------------------------------------------|-------------------------------------------------------------------------------------|-------------------------------------------------------------------------------------------|---|------------|
| NCT01849146 | <b>WEE1 Inhibitor AZD1775, Radiation Therapy, and Temozolomide in Treating Patients With Newly Diagnosed or Recurrent Glioblastoma</b> | Adult Glioblastoma;<br>Recurrent Glioblastoma                                       | Radiation/Temozolomide + MK1775                                                           | 1 | recruiting |
| NCT01748825 | <b>AZD1775 for Advanced Solid Tumors</b>                                                                                               | Neoplasms;<br>Lymphoma                                                              | MK1775                                                                                    | 1 | recruiting |
| NCT02341456 | <b>Phase Ib Study AZD1775 in Combination With Carboplatin and Paclitaxel in Adult Asian Patients With Solid Tumours</b>                | Advanced Solid Tumours                                                              | MK1775 vs.<br>MK1775 + Carboplatin vs.<br>MK1775 + Carboplatin/Paclitaxel                 | 1 | ongoing    |
| NCT02087241 | <b>Ph II Trial of Carboplatin and Pemetrexed With or Without AZD1775 for Untreated Lung Cancer</b>                                     | Non-Squamous Non Small Cell Lung Cancer (Stage IV)                                  | Carboplatin/Permetrexed ± MK1775                                                          | 2 | terminated |
| NCT02272790 | <b>AZD1775 Plus Chemotherapy in Patients With Platinum-Resistant Ovarian, Fallopian Tube, or Primary Peritoneal Cancer</b>             | Platinum-Resistant Epithelial Ovarian, Fallopian Tube, or Primary Peritoneal Cancer | MK1775 + Carboplatin vs.<br>MK1775 + Paclitaxel                                           | 2 | recruiting |
| NCT01827384 | <b>Molecular Profiling-Based Targeted Therapy in Treating Patients With Advanced Solid Tumors</b>                                      | Advanced Malignant Solid Neoplasm;<br>Recurrent Malignant Solid Neoplasm            | Veliparib + Temozolomide vs.<br>MK-1775 + Carboplatin vs.<br>Everolimus vs.<br>Trametinib | 2 | recruiting |

|             |                                                                                                                                                                                   |                                                                              |                                            |   |                    |
|-------------|-----------------------------------------------------------------------------------------------------------------------------------------------------------------------------------|------------------------------------------------------------------------------|--------------------------------------------|---|--------------------|
| NCT02666950 | <b>WEE1 Inhibitor AZD1775 With or Without Cytarabine in Treating Patients With Advanced Acute Myeloid Leukemia or Myelodysplastic Syndrome</b>                                    | Myelodysplastic/Myeloproliferative Neoplasm;<br>Adult Acute Myeloid Leukemia | Cytarabine ± MK1775                        | 2 | not yet recruiting |
| NCT02087176 | <b>A Placebo Controlled Study Comparing AZD1775+ Docetaxel Versus Placebo+Docetaxel to Treat Lung Cancer</b>                                                                      | Non Small Cell Lung Cancer                                                   | MK1775 + Docetaxel vs. Placebo + Docetaxel | 2 | terminated         |
| NCT02688907 | <b>Phase II, Single-arm Study of AZD1775 Monotherapy in Relapsed Small Cell Lung Cancer Patients With MYC Family Amplification or CDKN2A Mutation Combined With TP53 Mutation</b> | Small Cell Lung Cancer                                                       | MK1775                                     | 2 | not yet recruiting |
| NCT02593019 | <b>Phase II, Single-arm Study of AZD1775 Monotherapy in Relapsed Small Cell Lung Cancer Patients</b>                                                                              | Small Cell Lung Cancer                                                       | MK1775                                     | 2 | recruiting         |
| NCT02381548 | <b>Phase I Trial of AZD1775 and Belinostat in Treating Patients With Relapsed or Refractory Myeloid Malignancies or Untreated Acute Myeloid Leukemia</b>                          | Acute Myeloid Leukemia;<br>Chronic Myelogenous Leukemia (bcr-Abl1+)          | MK1775 + Belinostat                        | 1 | recruiting         |

|             |                                                                                                                                                                         |                                                                                      |                                |   |            |
|-------------|-------------------------------------------------------------------------------------------------------------------------------------------------------------------------|--------------------------------------------------------------------------------------|--------------------------------|---|------------|
| NCT02207010 | <b>A Phase 0 Study of AZD1775 in Recurrent GBM Patients</b>                                                                                                             | (Multiforme) Glioblastoma                                                            | MK1775                         | 1 | ongoing    |
| NCT02585973 | <b>Dose-escalating AZD1775 + Concurrent Radiation + Cisplatin for Intermediate/High Risk HNSCC</b>                                                                      | Squamous Cell Carcinoma of Head and Neck                                             | MK1775 + Cisplatin/Radiation   | 1 | recruiting |
| NCT02791919 | <b>Wee1 Kinase Inhibitor AZD1775 and Combination Chemotherapy in Treating Children, Adolescents and Young Adults With Relapsed or Refractory Acute Myeloid Leukemia</b> | Adult Acute Myeloid Leukemia;<br>Childhood Acute Myeloid Leukemia                    | MK1775 + Fludrabine/Cytarabine | 1 | Withdrawn  |
| NCT02465060 | <b>NCI-MATCH: Targeted Therapy Directed by Genetic Testing in Treating Patients With Advanced Refractory Solid Tumors, Lymphomas, or Multiple Myeloma</b>               | Plasma Cell Myeloma;<br>Lymphoma;<br>Malignant Neoplasm;<br>Malignant Solid Neoplasm | MK1775*                        | 2 | recruiting |

**Table S1:** Overview about current and already completed clinical trials with WEE1 inhibitor MK1775 (AZD1775) (last update 06/22/2017)

\* only for patients with mutation in BRCA1 or BRCA2 gene
